# Supplementary material for: A Robust Phenotypic High-Throughput Antiviral Assay for the Discovery of Rabies Virus Inhibitors
Source: MDPI journal article supplement (doi:10.3390/v15122292), 2023-11-23
Supplement: s1 [file s1]

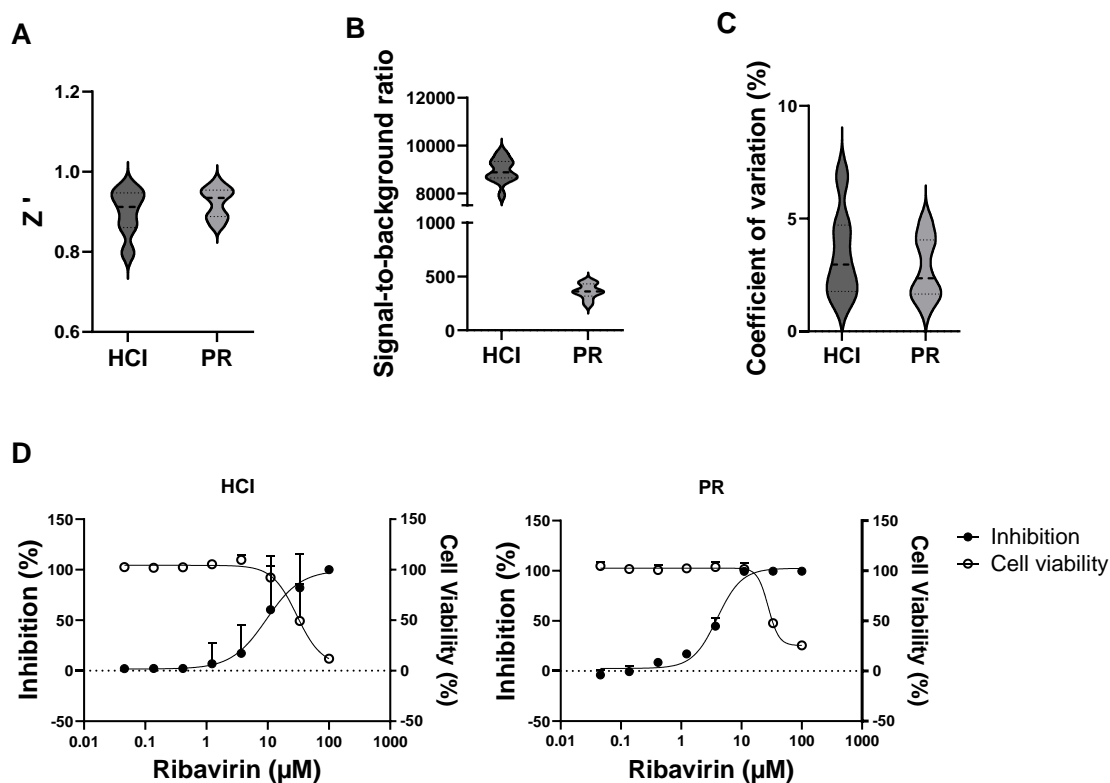

**Figure S1.** Antiviral activity comparison of HCI and PR assay. Z' (A), S/B (B) and CV% (C) of HCI (used for HTS) and plate-reader (PR = whole-well fluorescence – used for hit confirmation) antiviral assays. The average Z' factors are 0.90 in HCI and 0.92 in PR; signal-to-background ratio are 8960 in HCI and 362 in PR; percentage of coefficient of variation of infected control are 3.4% in HCI and 2.7% in PR. The violin plot graphs show data from 13 plates. (D) Anti-RABV activity of ribavirin in BHK-21 cells in HCI and PR assay. Serial dilutions of ribavirin were added together with mCherry-RABV (MOI 0.019 in HCI assay, MOI 0.01 in PR assay) to BHK-21 cells. Antiviral activity and cell viability were determined by HCI analysis for 384-well assay, or by using a standard plate reader (PR) for 96-well assay. Fitting the dose-response curves results in the calculation of EC<sub>50</sub> of ribavirin of 9.5  $\mu$ M and 3.9  $\mu$ M, and CC<sub>50</sub> of 30  $\mu$ M and 28  $\mu$ M, respectively. Averages and standard deviations of at least 3 independent experiments are presented.

**Table S1.** Effect of selected molecules on *in vitro* RABV replication.

| Compounds              | Screening antiviral activity at 10 $\mu$ M |             | Dose response confirmation               |                                          |                 |
|------------------------|--------------------------------------------|-------------|------------------------------------------|------------------------------------------|-----------------|
|                        | % infection                                | % viability | EC <sub>50</sub> ( $\mu$ M) <sup>a</sup> | CC <sub>50</sub> ( $\mu$ M) <sup>b</sup> | SI <sup>c</sup> |
| Cyproheptadine         | 21                                         | 78          | 5.6 $\pm$ 0.95                           | 39 $\pm$ 13                              | 6.9             |
| Levamlodipine          | 5.3                                        | 60          | 7.9 $\pm$ 3.1                            | 24 $\pm$ 2.0                             | 3.1             |
| Dasatinib              | 7.0                                        | 65          | 2.0 $\pm$ 2.6                            | 5.8 $\pm$ 4.8                            | 2.9             |
| Salinomycin            | 20                                         | 63          | <0.080                                   | 3.0 $\pm$ 0.8                            | >38             |
| Ribavirin <sup>d</sup> | 40                                         | 92          | 5.1 $\pm$ 1.6                            | 36 $\pm$ 18                              | 7.0             |

a. Concentration at which present virus infection was reduced by 50%.

b. Concentration at which cell viability was reduced by 50%.

c. Selectivity index (ratio of CC<sub>50</sub> to EC<sub>50</sub>).

d. Included as reference compound.
